# Supplementary material for: Micro-controlling of the grain boundaries in NiCo2O4/NiCo2S4 nanowires for enhanced charge storage
Source: Royal Society of Chemistry journal article supplement (doi:10.1039/d1dt02941j), 2021-01-01
Supplement: d1dt02941j1.pdf [file d1dt02941j1.pdf]

**Electronic Supplementary Material (ESI) for Dalton Transactions.  
This journal is © The Royal Society of Chemistry 2021**

**Electronic Supplementary Information (ESI)**  
**Micro-Engineering the Grain Boundary of NiCo<sub>2</sub>O<sub>4</sub>/NiCo<sub>2</sub>S<sub>4</sub>**  
**Nanowire Arrays to Achieve the Enhanced Charge Storage**

Mengqi Cui <sup>a</sup>, Zining Wang <sup>a</sup>, Hui Wang <sup>\*a</sup>, Xuyun Wang <sup>a</sup>, Jianwei Ren <sup>\*\*b</sup>

<sup>a</sup> State Key Laboratory Base for Eco-Chemical Engineering, College of Chemical Engineering, Qingdao University of Science and Technology, Qingdao, 266042, China

<sup>b</sup>Department of Mechanical Engineering Science, University of Johannesburg, Cnr Kingsway and University Roads, Auckland Park, 2092, Johannesburg, South Africa.

Corresponding Author

Hui Wang (\*): wangh@qust.edu.cn

Jianwei Ren (\*\*): jren@uj.ac.za

**Physical characterization**

Crystal structure of as-prepared samples was studied on a Shimadzu XD-3A diffractometer where XRD patterns were recorded at 10 ° min<sup>-1</sup> using Cu- K $\alpha$  radiation with  $\lambda=0.15418$  nm. Their microstructure was investigated on a Carl Zeiss scanning electron microscope and a JEOL (JEM-2000 FX) transmission electron microscope.

High angle annular dark field scanning transmission electron microscopy (STEM) images of the catalysts were taken using the same JEOL instrument operating at 200 kV. X-ray photoelectron spectroscopy (XPS) was carried out on a PHI-5702 spectrometer and C1 s peak at 285.0 eV was used as a reference for binding energies calibration.

### **Electrochemical measurements**

Electrochemical performance of as-prepared NiCo<sub>2</sub>O<sub>4</sub>/NiCo<sub>2</sub>S<sub>4</sub> was studied using a CHI 660E electrochemical workstation. The experiments were carried out in a three-electrode configuration with a 1×1 cm<sup>2</sup> sample, activated carbon (AC) and Hg/HgO (1.0 M KOH) serving as a working electrode, a counter electrode and a reference electrode respectively. Cyclic voltammetry (CV) graphs were recorded in a three- and a two-electrode systems in 1 M KOH aqueous electrolytes. Galvanostatic charge/discharge (GCD) and cycling tests were conducted using a LAND CT2001A battery measurement system. Areal specific capacity ( $C_a$ ), energy density ( $E$ ) and power density ( $P$ ) were calculated according to the following equations:

$$C_a = 2I \times \int V dt / (A \times V) \quad (1)$$

$$E = C_m \times (\Delta V)^2 / 2 \quad (2)$$

$$P = E / \Delta t \quad (3)$$

where  $I$ ,  $t$ ,  $m$ ,  $\Delta V$ , and  $A$  represent discharge current (mA), discharge time (s), total mass of active materials (g), electrode potential window (V), and electrode surface area (cm<sup>2</sup>) respectively.

Prior to assembly of the asymmetric supercapacitor, mass loadings of both cathode

and anode were balanced according to the following equation:

$$m^+/m^- = C^- \times \Delta E^- / (C^+ \times \Delta E^+) \quad (4)$$

where mass ratio of cathode to anode particles was set at 0.3.

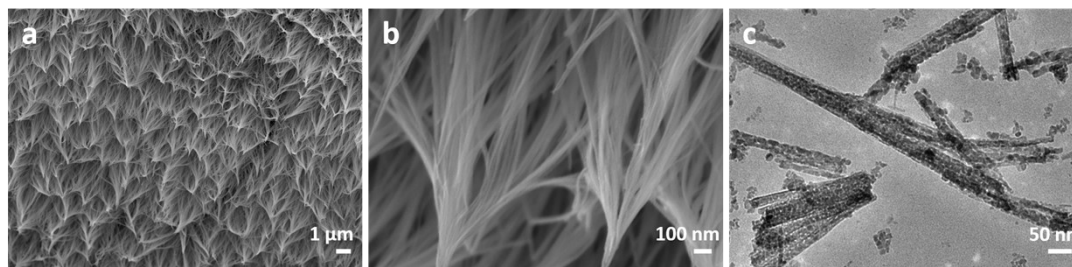

Fig. S1 (a, b) SEM and (c) TEM of NiCo<sub>2</sub>O<sub>4</sub> rods.

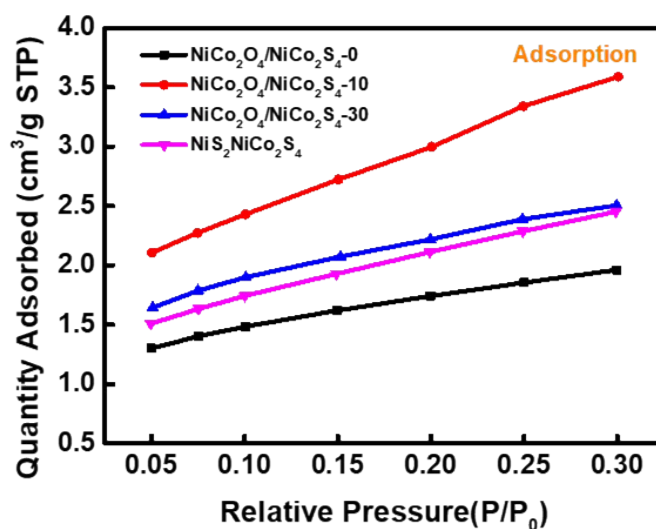

Fig. S2 N<sub>2</sub> isotherms of all samples.

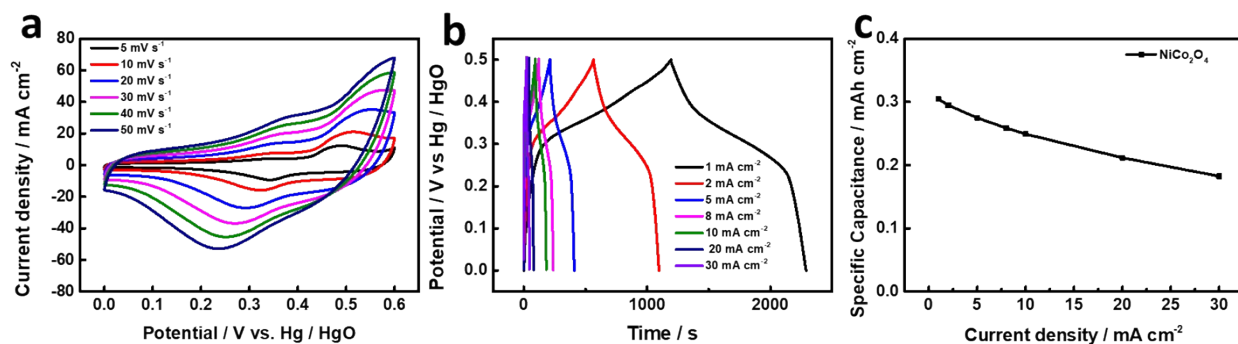

Fig. S3 CV(a), GCD(b) and area specific capacitance vs. current density curves(c) of

NiCo<sub>2</sub>O<sub>4</sub>.

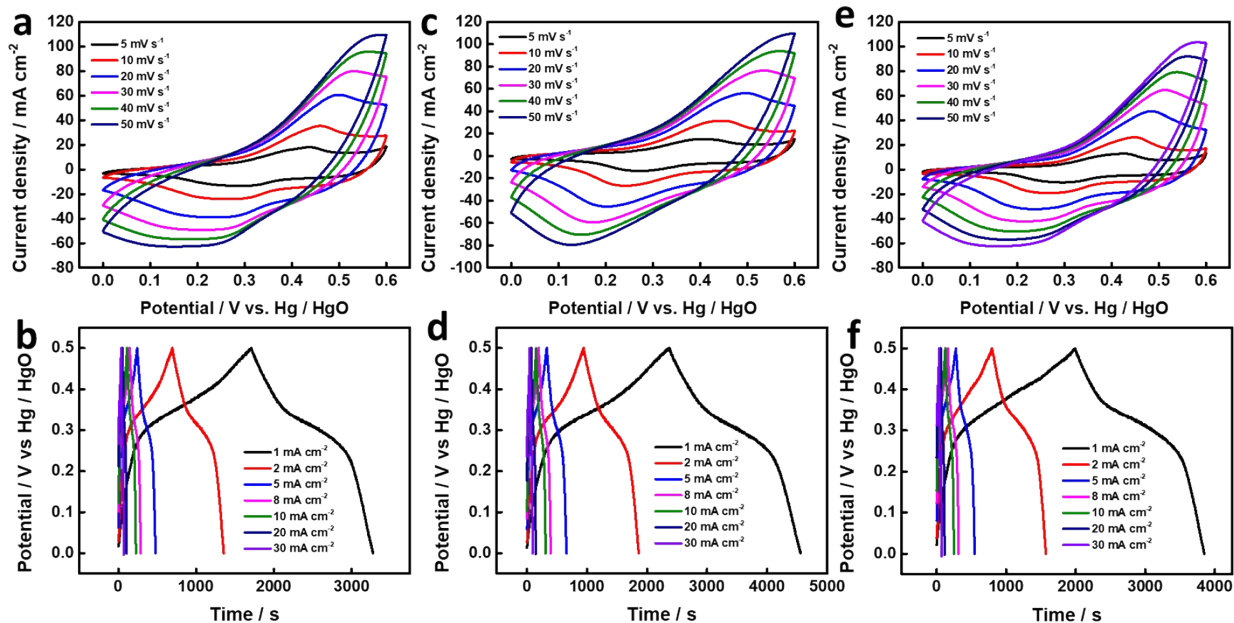

**Fig. S4** (a) CV curves of NiCo<sub>2</sub>O<sub>4</sub>/NiCo<sub>2</sub>S<sub>4</sub>-0 at various scan rates; (b) GCD curves of NiCo<sub>2</sub>O<sub>4</sub>/NiCo<sub>2</sub>S<sub>4</sub>-0 at different current densities; (c) CV curves of NiCo<sub>2</sub>O<sub>4</sub>/NiCo<sub>2</sub>S<sub>4</sub>-30 at various scan rates; (d) GCD curves of NiCo<sub>2</sub>O<sub>4</sub>/NiCo<sub>2</sub>S<sub>4</sub>-30 at different current densities. (e) CV curves of NiS<sub>2</sub>/NiCo<sub>2</sub>S<sub>4</sub> at various scan rates; (d) GCD curves of NiS<sub>2</sub>/NiCo<sub>2</sub>S<sub>4</sub> at different current densities.

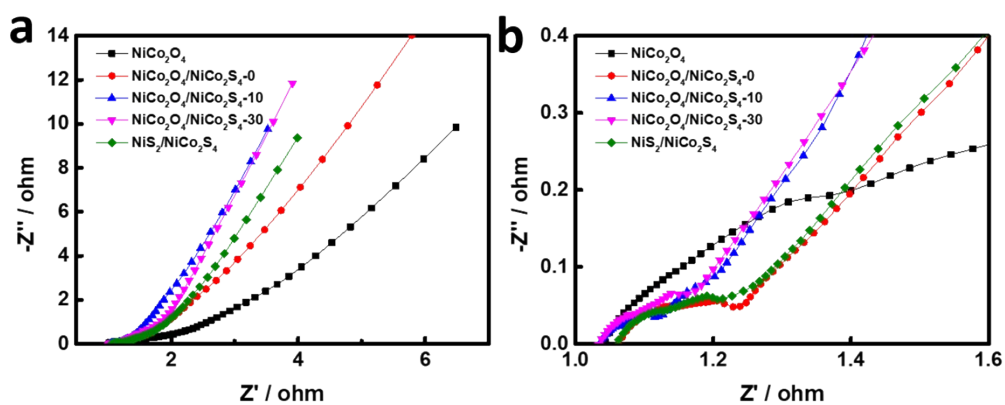

**Fig. S5** EIS of all the samples.

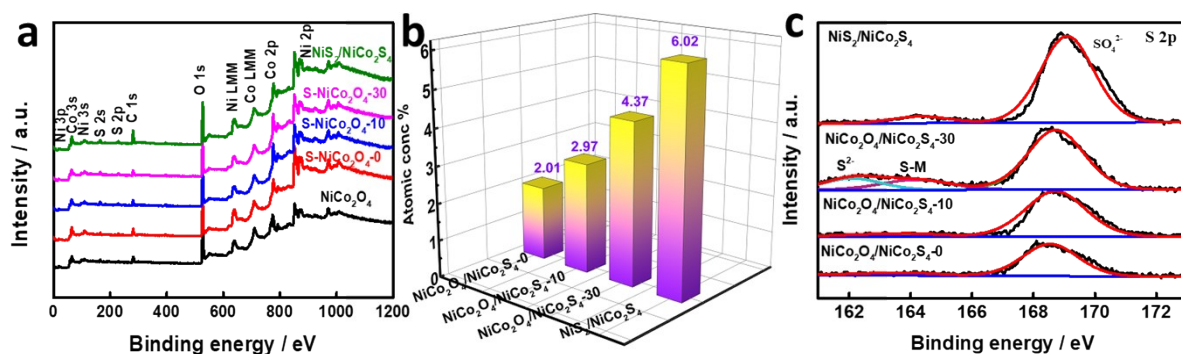

**Fig. S6** (a) XPS survey spectrum, (b) S atomic content based on the integral area from a, and (c) the fitted S 2p XPS of the all samples.

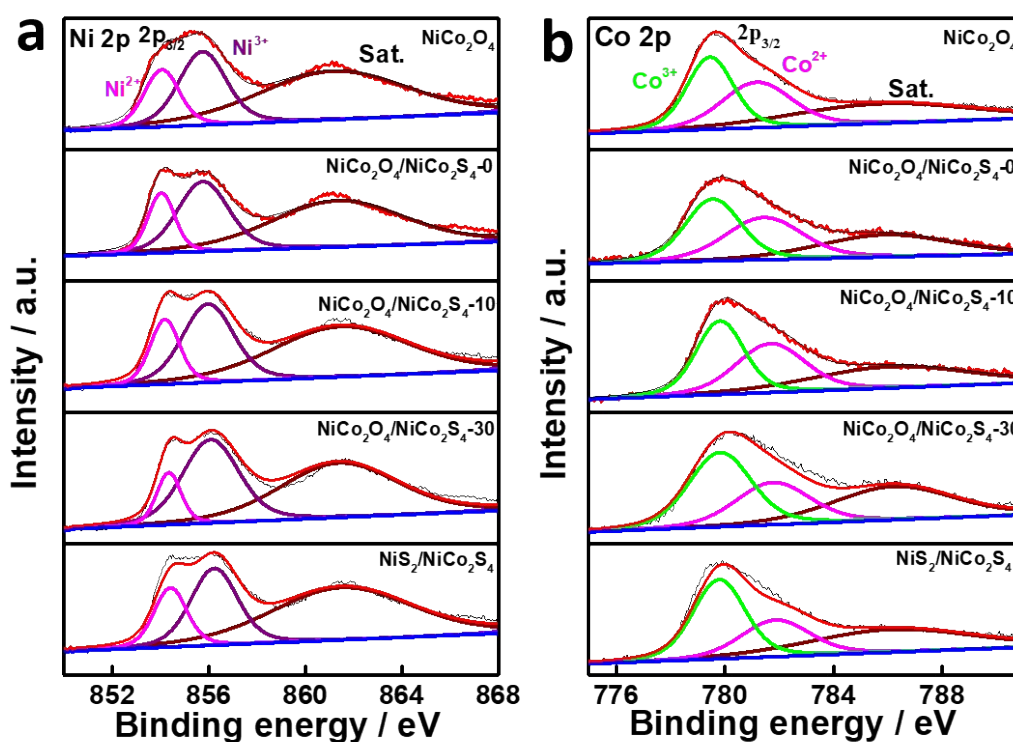

**Fig. S7** The fitted Ni 2p XPS and Co 2p XPS spectra of the samples.

**Table S1.** The fitted impedance from EIS of all the samples.

| <b>Samples</b>                                                         | <b>Rct(ohm)</b> | <b>Zw(ohm)</b> |
|------------------------------------------------------------------------|-----------------|----------------|
| NiCo <sub>2</sub> O <sub>4</sub>                                       | 1.051           | 2.087          |
| NiCo <sub>2</sub> O <sub>4</sub> /NiCo <sub>2</sub> S <sub>4</sub> -0  | 1.072           | 3.393          |
| NiCo <sub>2</sub> O <sub>4</sub> /NiCo <sub>2</sub> S <sub>4</sub> -10 | 1.046           | 5.269          |
| NiCo <sub>2</sub> O <sub>4</sub> /NiCo <sub>2</sub> S <sub>4</sub> -30 | 1.045           | 4.79           |
| NiS <sub>2</sub> / NiCo <sub>2</sub> S <sub>4</sub>                    | 1.067           | 4.69           |

**Table S2.** The conductivity of the samples.

| <b>Samples</b>                                                         | <b>Square resistance/mΩ</b> | <b>Conductivity/KS/mm</b> |
|------------------------------------------------------------------------|-----------------------------|---------------------------|
| NiCo <sub>2</sub> O <sub>4</sub>                                       | 6.05495                     | 0.10898                   |
| NiCo <sub>2</sub> O <sub>4</sub> /NiCo <sub>2</sub> S <sub>4</sub> -0  | 6.53595                     | 0.10338                   |
| NiCo <sub>2</sub> O <sub>4</sub> /NiCo <sub>2</sub> S <sub>4</sub> -10 | 5.23399                     | 0.12680                   |
| NiCo <sub>2</sub> O <sub>4</sub> /NiCo <sub>2</sub> S <sub>4</sub> -30 | 5.54320                     | 0.12196                   |
| NiS <sub>2</sub> / NiCo <sub>2</sub> S <sub>4</sub>                    | 5.86631                     | 0.11463                   |

**Table S3.** The binding energy of the fitted Ni species of the samples.

| Sample                                                                 | Binding energy and atomic percentage of Ni species (eV/%) |               |
|------------------------------------------------------------------------|-----------------------------------------------------------|---------------|
|                                                                        | Ni(+2)                                                    | Ni(+3)        |
| NiCo <sub>2</sub> O <sub>4</sub>                                       | 854.03/31.16%                                             | 855.72/68.84% |
| NiCo <sub>2</sub> O <sub>4</sub> /NiCo <sub>2</sub> S <sub>4</sub> -0  | 854.03/30.68%                                             | 855.78/69.32% |
| NiCo <sub>2</sub> O <sub>4</sub> /NiCo <sub>2</sub> S <sub>4</sub> -10 | 854.18/28.87%                                             | 855.95/71.13% |
| NiCo <sub>2</sub> O <sub>4</sub> /NiCo <sub>2</sub> S <sub>4</sub> -30 | 854.32/21.53%                                             | 856.06/78.47% |
| NiS <sub>2</sub> / NiCo <sub>2</sub> S <sub>4</sub>                    | 854.45/24.71%                                             | 856.23/75.29% |

**Table S4.** The binding energy of the fitted Co species of the samples.

| Sample                                                                 | Binding energy and atomic percentage of Co species (eV/%) |               |
|------------------------------------------------------------------------|-----------------------------------------------------------|---------------|
|                                                                        | Co(+2)                                                    | Co(+3)        |
| NiCo <sub>2</sub> O <sub>4</sub>                                       | 781.23/50.29%                                             | 779.47/49.71% |
| NiCo <sub>2</sub> O <sub>4</sub> /NiCo <sub>2</sub> S <sub>4</sub> -0  | 781.50/52.58%                                             | 779.57/47.42% |
| NiCo <sub>2</sub> O <sub>4</sub> /NiCo <sub>2</sub> S <sub>4</sub> -10 | 781.69/53.67%                                             | 779.83/46.33% |
| NiCo <sub>2</sub> O <sub>4</sub> /NiCo <sub>2</sub> S <sub>4</sub> -30 | 781.87/50.48%                                             | 779.83/49.52% |
| NiS <sub>2</sub> / NiCo <sub>2</sub> S <sub>4</sub>                    | 781.97/47.51%                                             | 779.83/52.49% |

**Table S5.** Comparison of cycle stability of the different samples.

| Samples                                                            | Stability            | Ref       |
|--------------------------------------------------------------------|----------------------|-----------|
| NiCo <sub>2</sub> O <sub>4</sub> /NiCo <sub>2</sub> S <sub>4</sub> | 88.1%(9000 cycles)   | This work |
| P-NiCo <sub>2</sub> S <sub>4</sub>                                 | 87.5%(5000 cycles)   | 1         |
| NiCo <sub>2</sub> S <sub>4</sub> @NiCo <sub>2</sub> O <sub>4</sub> | 82% (1000 cycles)    | 2         |
| NiCo <sub>2</sub> S <sub>4</sub> /rGO//AC                          | 90.2% (10000 cycles) | 3         |
| NiCo <sub>x</sub> O <sub>y</sub>                                   | 77% (1500 cycles)    | 4         |
| NiCo <sub>2</sub> S <sub>4</sub>                                   | 87% ( 5000 cycles)   | 5         |
| NiMn-G-LDH@NiCo <sub>2</sub> S <sub>4</sub>                        | 86.4% (10000 cycles) | 6         |

## References

- 1 J. Lin, Y. Wang, X. Zheng, H. Liang, H. Jia, J. Qi, J. Cao, J. Tu, W. Fei and J. Feng, *Dalton Trans*, 2018, **47**, 8771-8778.
- 2 A. Singh, S. K. Ojha, M. Singh and A. K. Ojha, *Electrochimica Acta*, 2020, **349**, 136349.
- 3 M. Dong, Z. Wang, G. Yan, J. Wang, H. Guo and X. Li, *J Alloy Compd*, 2020, **822**, 153645.
- 4 R. Ding, M. Zhang, Y. Yao and H. Gao, *J Colloid Interface Sci*, 2016, **467**, 140-147.
- 5 H. Zheng, H. Zhu, M. Zhang, M. Zhang, R. Liu, X. Song, J. Wu, C. Zhang, Q. Song and H. Cui, *Vacuum*, 2020, **182**, 109648.
- 6 S. Chen, C. Lu, L. Liu, M. Xu, J. Wang, Q. Deng, Z. Zeng and S. Deng, *Nanoscale*, 2020, **12**, 1852-1863.
